# Supplementary material for: Fluorescent carboxylic and phosphonic acids: comparative photophysics from solution to organic nanoparticles
Source: Royal Society of Chemistry journal article supplement (doi:10.1039/c3cp51369f), 2013-01-01
Supplement: c3cp51369f.pdf [file c3cp51369f.pdf]

## Supporting Information to Accompany

# Fluorescent Carboxylic and Phosphonic Acids: Comparative Photophysics from Solution to Organic Nanoparticles

Contribution from

CEISAM – UMR CNRS 6230, Université de Nantes, 2 rue de la Houssinière, BP 92208,  
44 322 Nantes cedex 3, France  
elena.ishow@univ-nantes.fr

Adrien Faucon, Romaric Lenk, Julie Hémez, Eric Gautron, Denis Jacquemin, Jean-  
Yves Le Questel, Jérôme Gratton, Arnaud Brosseau, and Eléna Ishow\*

### Table of content

1. Infrared spectra in  $\text{CCl}_4$  solution
2. Infrared spectra in the solid state
3. DSC thermal analyses

### Experimental Section

#### 1. Infrared spectra in $\text{CCl}_4$ solution

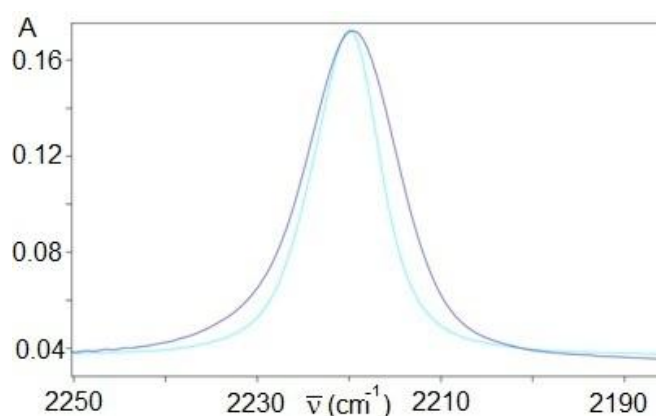

**Fig. S1** Infrared absorption band of the CN unit, centered at  $2220\text{ cm}^{-1}$  for **fPOH** (—) and **fPOEt** (---) in  $\text{CCl}_4$  solution ( $10^{-4}\text{ mol.L}^{-1}$ ).

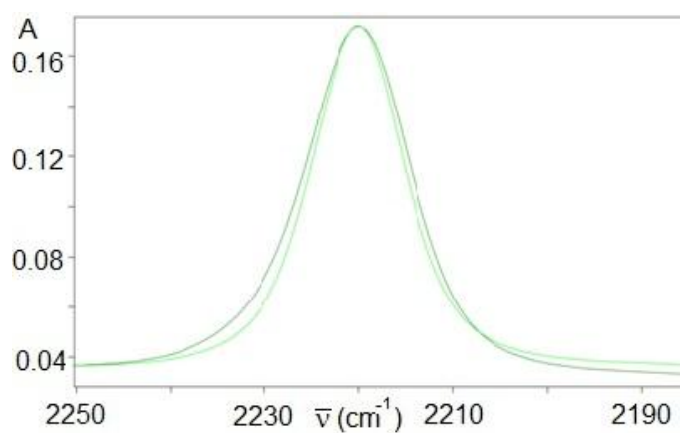

**Fig. S2** Infrared absorption band of the CN unit, centered at 2220  $\text{cm}^{-1}$  for **fPOH** (—) and **fPOEt** (—) in  $\text{CHCl}_3$  solution ( $10^{-4} \text{ mol.L}^{-1}$ ).

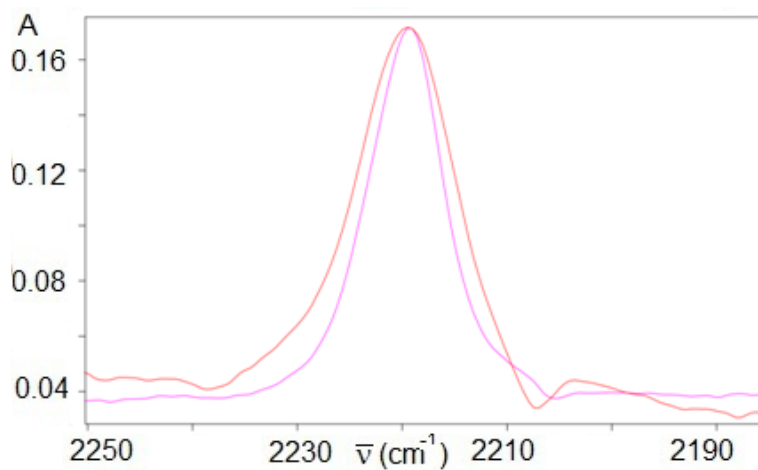

**Fig. S3** Infrared absorption band of the CN unit, centered at 2220  $\text{cm}^{-1}$  for **fPOH** (—) and **fPOEt** (—) in toluene solution ( $10^{-4} \text{ mol.L}^{-1}$ ).

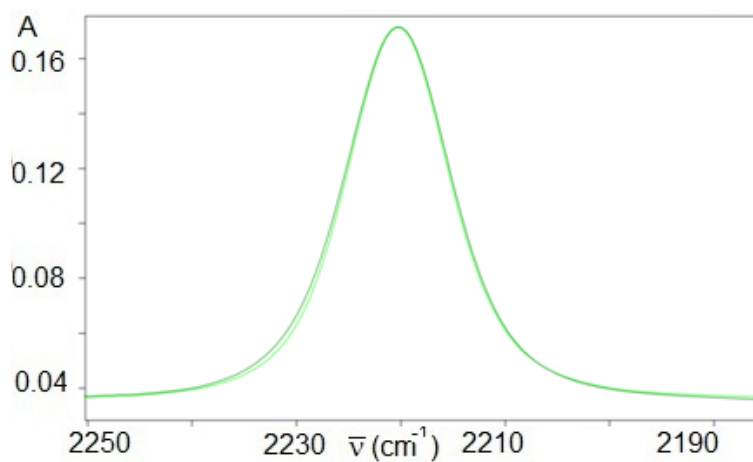

**Fig. S4** Infrared absorption band of the CN unit, centered at 2220  $\text{cm}^{-1}$  for **fCO<sub>2</sub>H** (—) and **fOtBu** (—) in  $\text{CHCl}_3$  solution ( $10^{-4} \text{ mol.L}^{-1}$ ).

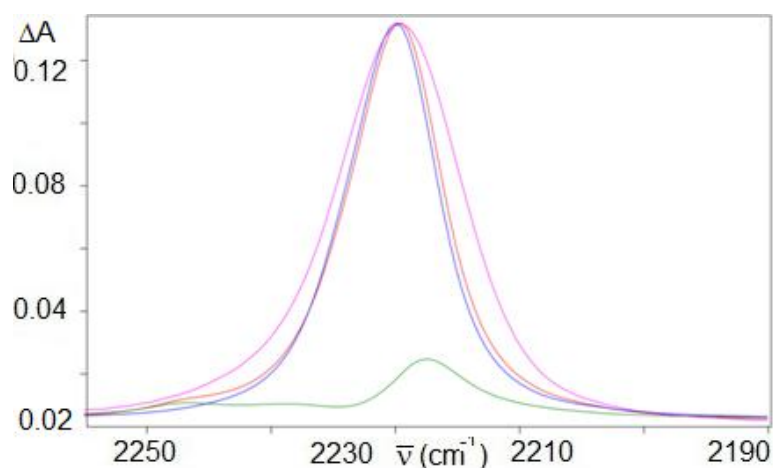

**Fig. S5** Infrared absorption band of the CN unit, centered at  $2220 \text{ cm}^{-1}$  for **fPOH** (—) and **fPOEt** before (—) and (—) after adding 4-fluorophenol (4FP) in excess in  $\text{CCl}_4$  solution ( $10^{-4} \text{ mol.L}^{-1}$ ). The spectrum resulting from the subtraction after and before adding 4FP to the solution of fPOEt (—) is indicated and shows a neat bathochromic shift, featuring strong hydrogen bonding.

## 2. Infrared spectra in the solid state

Solid state spectra were recorded in the ATR mode using a FTIR Bruker Vertex 70 spectrometer.

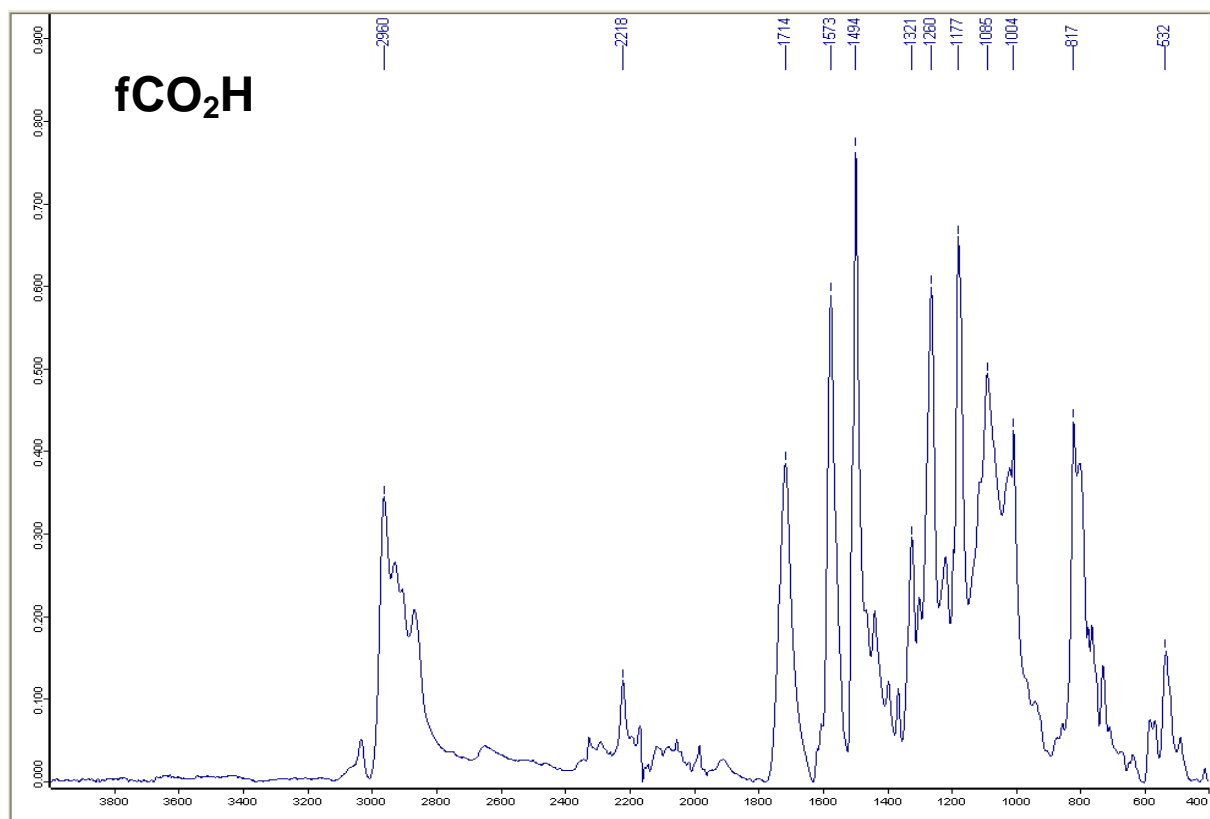

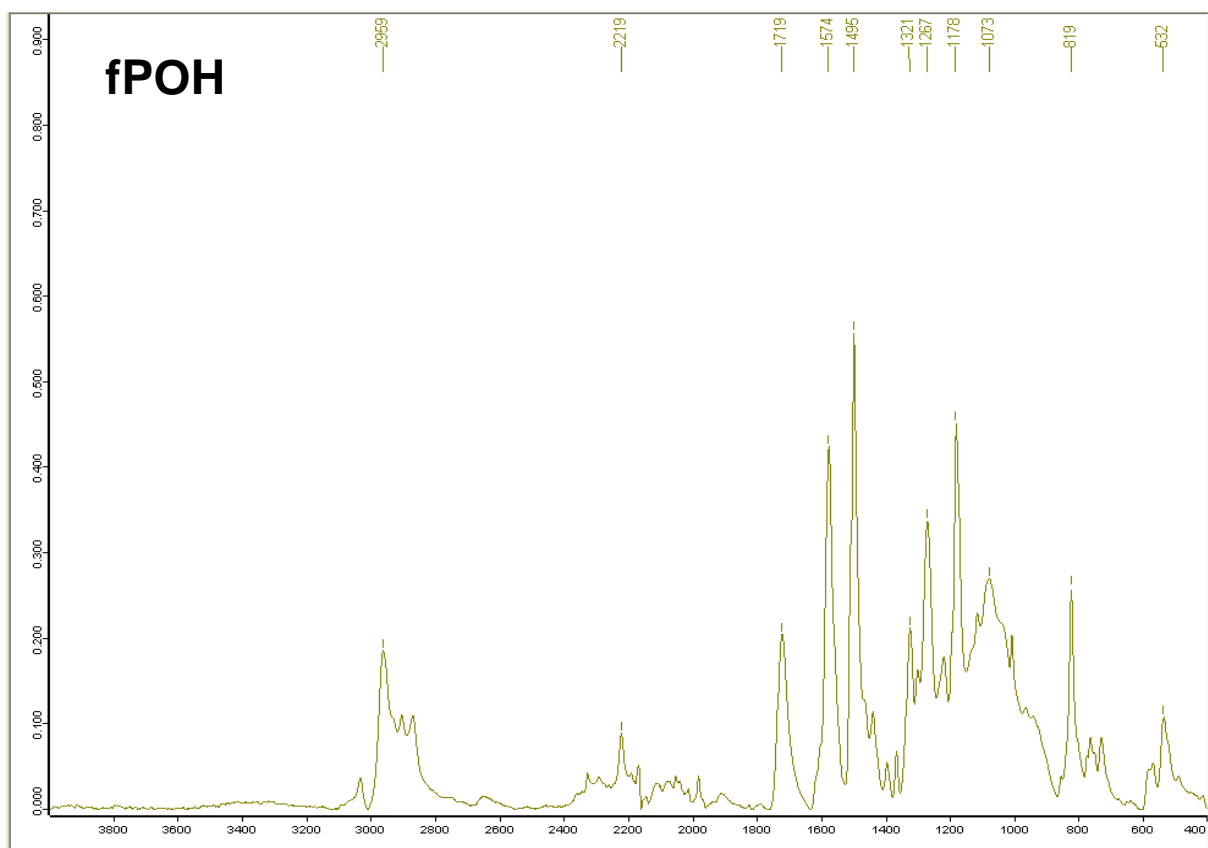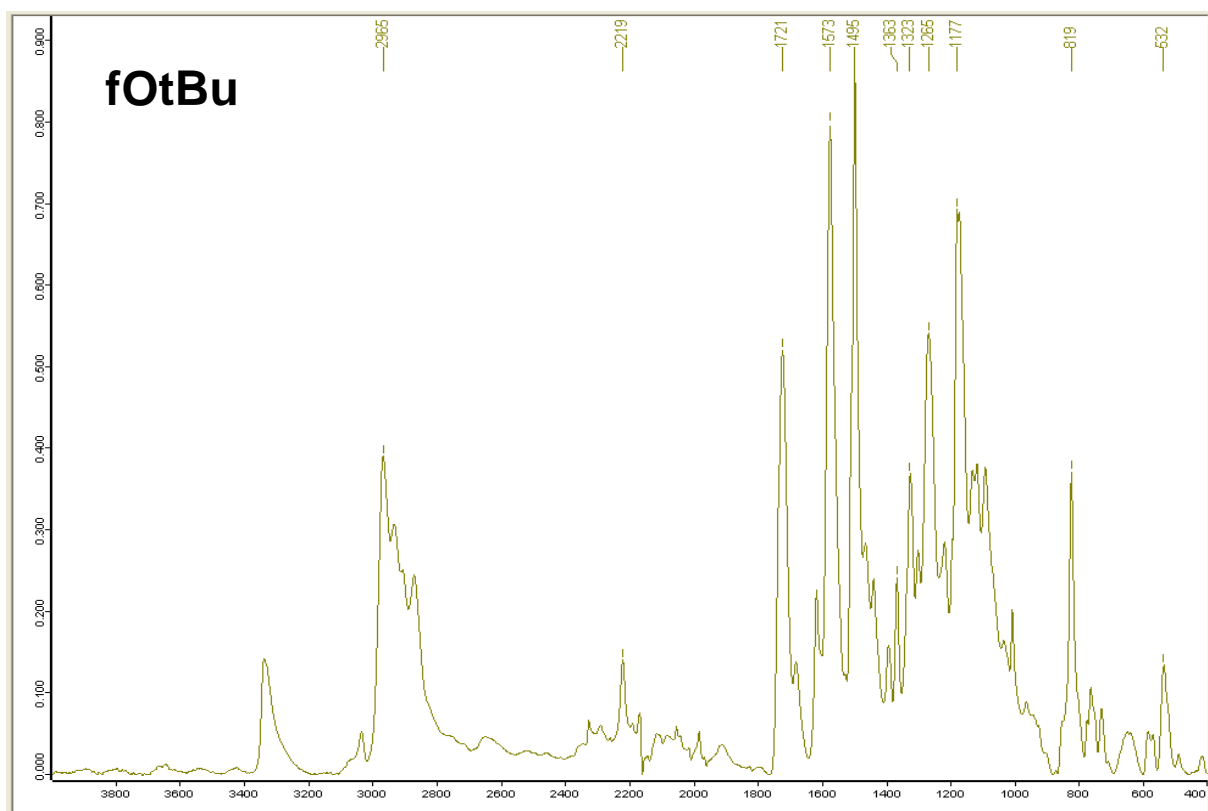

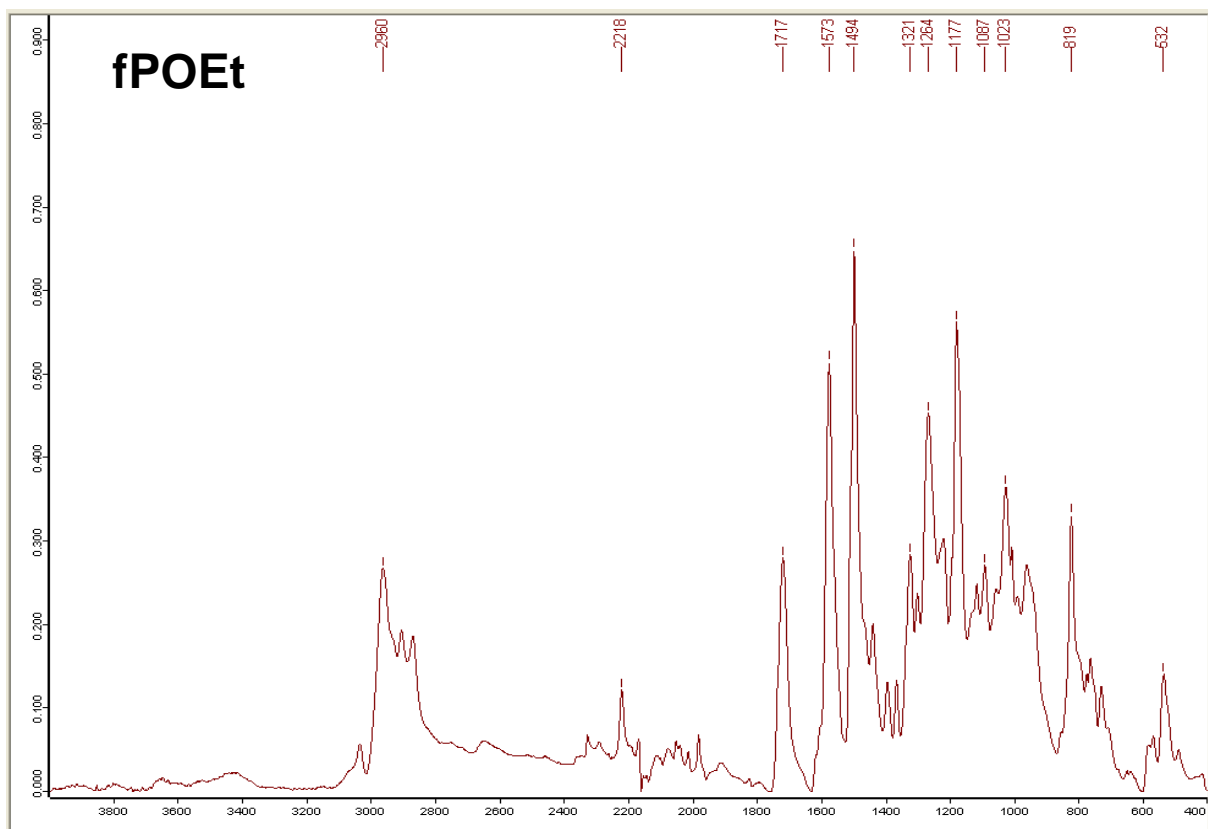

### 3. DSC thermal analyses

Thermal properties were measured by using differential scanning calorimetry (Netzsch- Maia DSC 200 F3) in alumina caps under a nitrogen flow at a scan rate of  $30\text{ }^{\circ}\text{C}\cdot\text{min}^{-1}$  over the temperature range  $[-10^{\circ}\text{C} - 250^{\circ}\text{C}]$

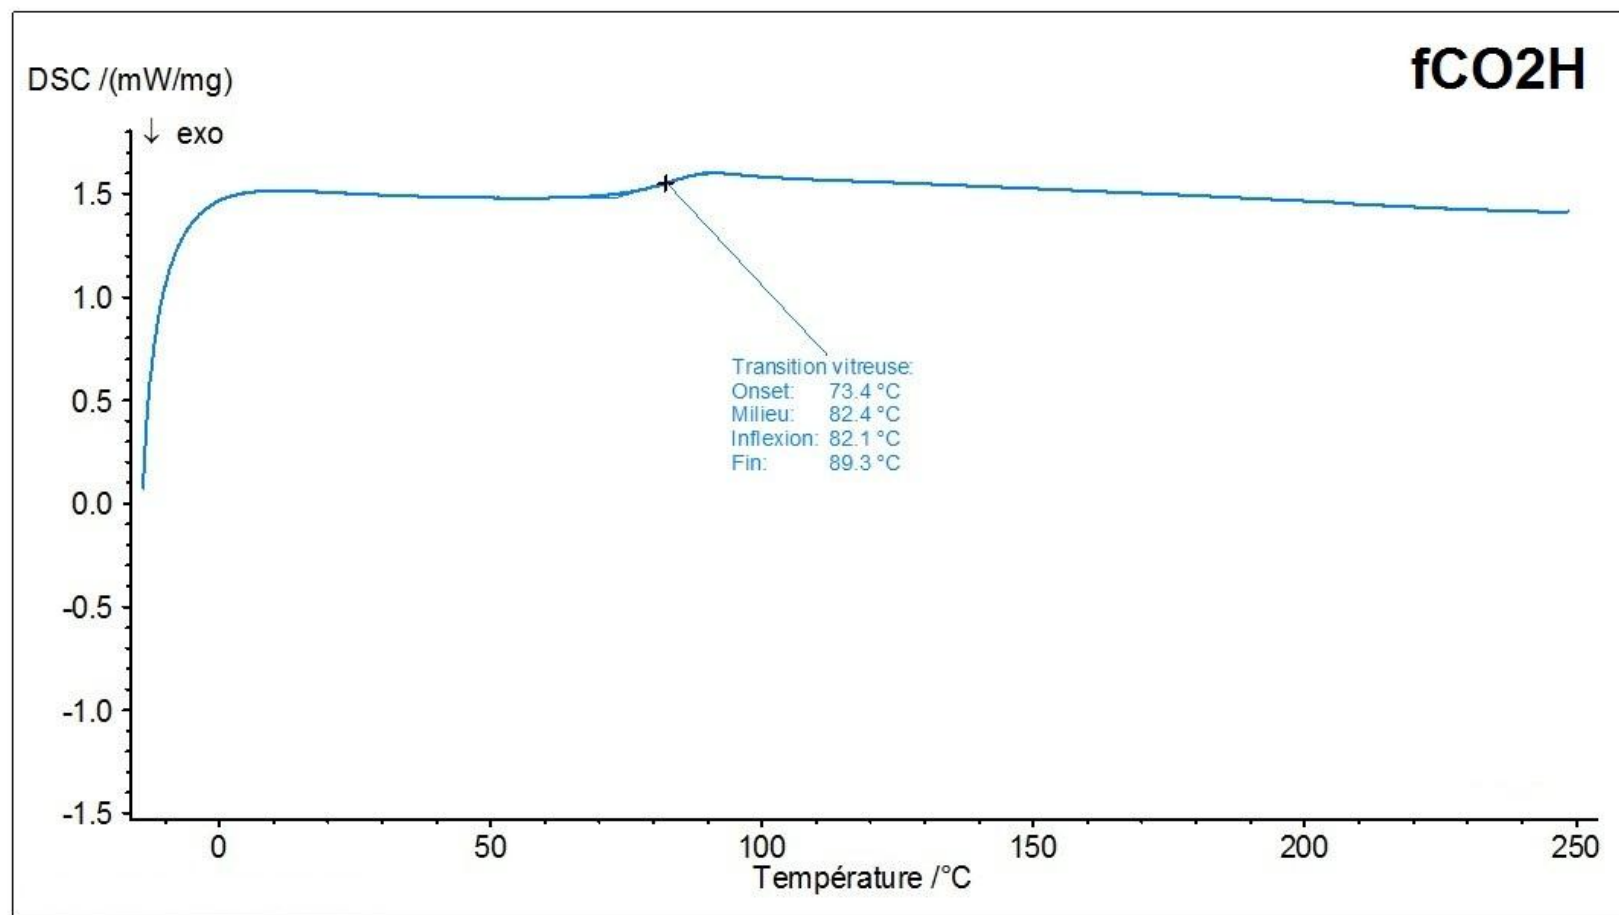

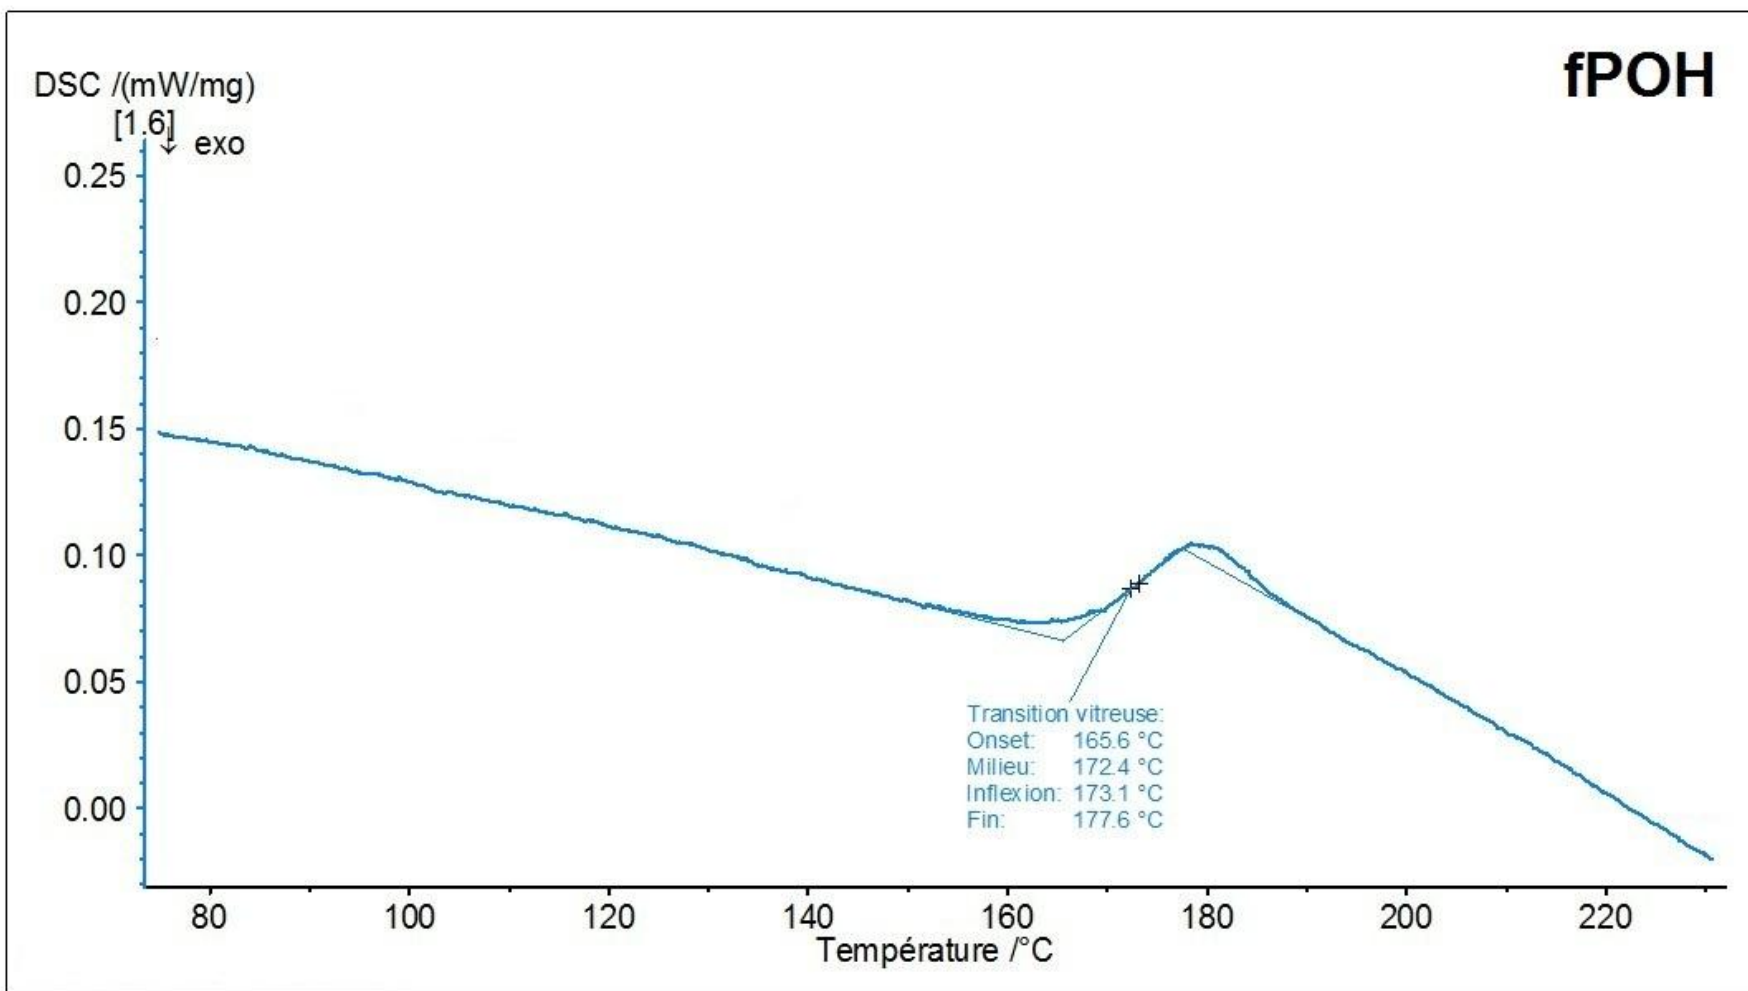

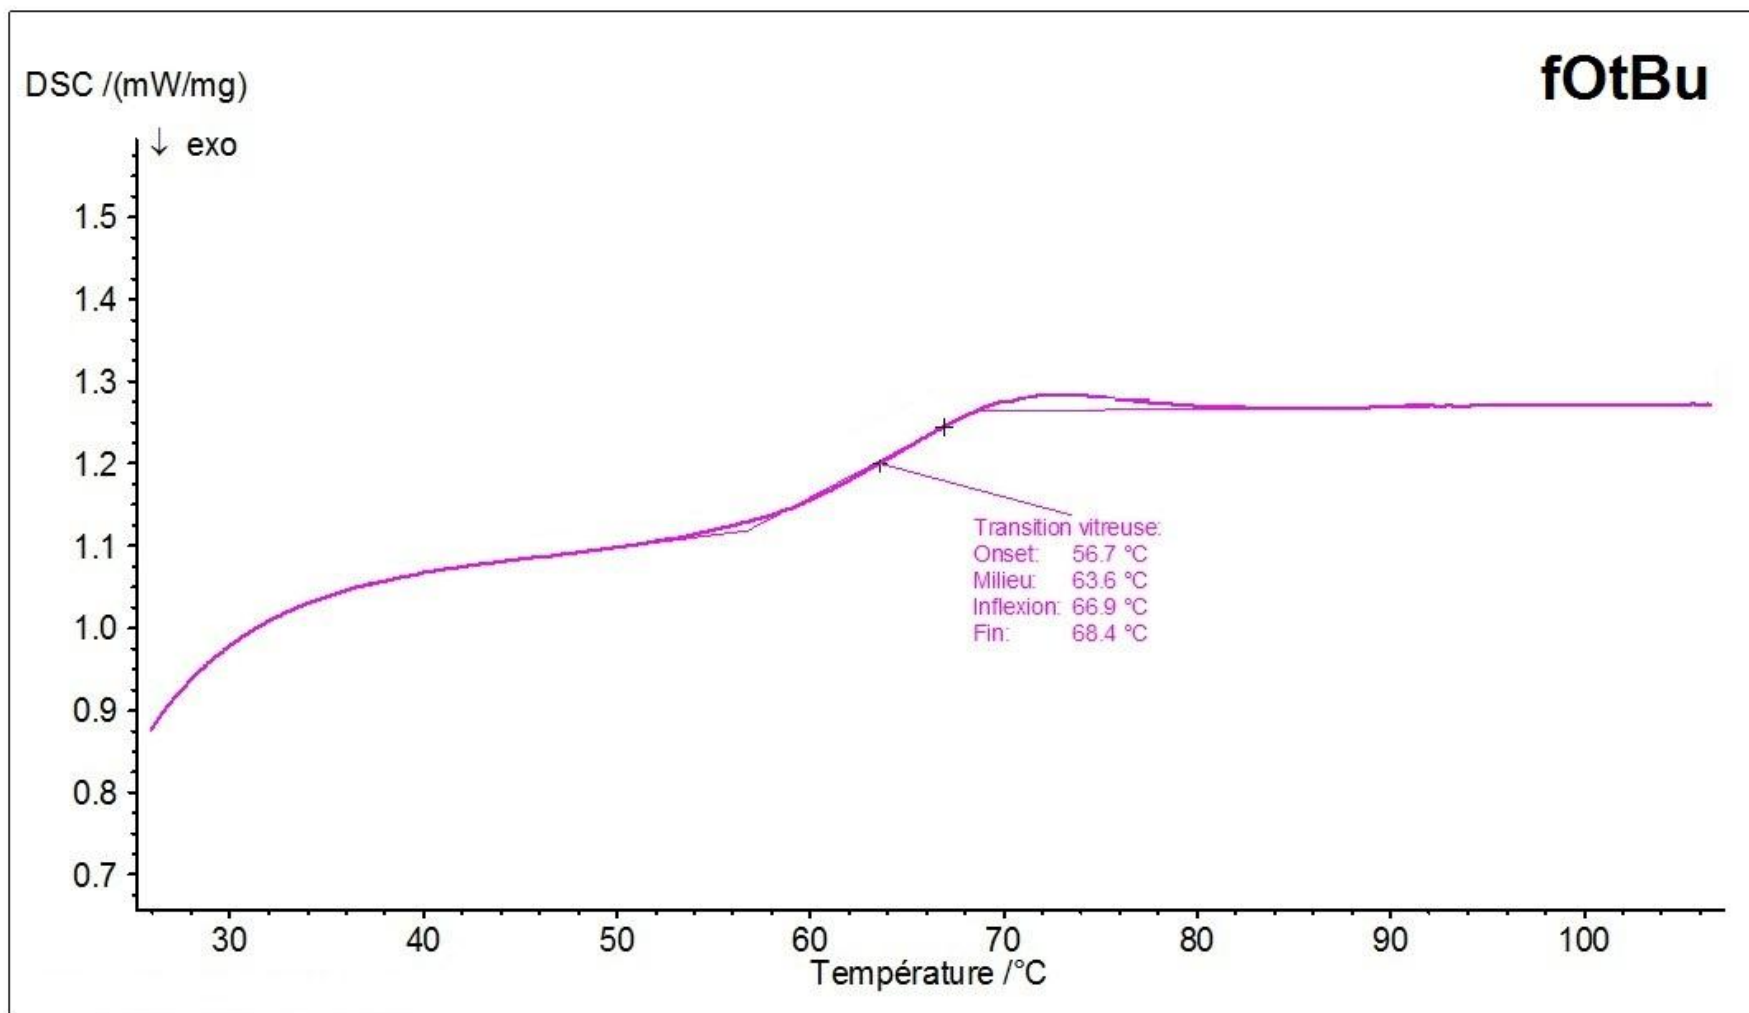



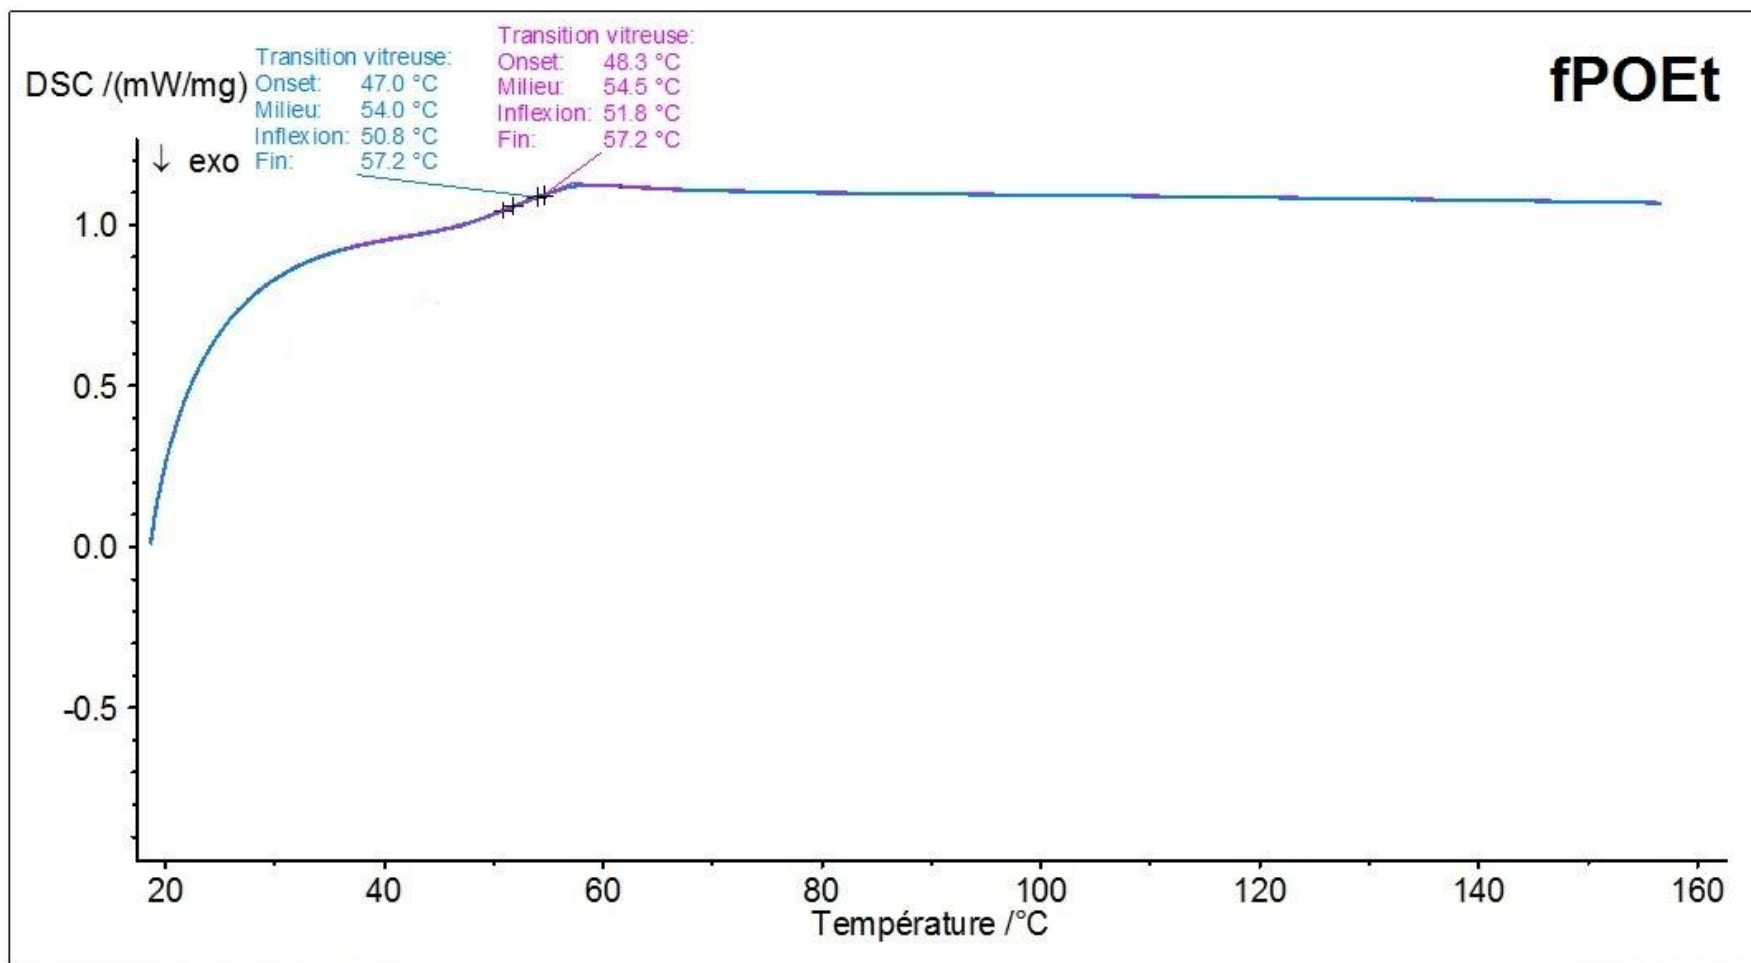

Thermal gradient: blue curve 20 °C.min<sup>-1</sup> ; pink curve : 30 °C.min<sup>-1</sup>.
